# Supplementary material for: Knockdown of Antisense Noncoding Mitochondrial RNA Reduces Tumorigenicity of Patient-Derived Clear Cell Renal Carcinoma Cells in an Orthotopic Xenograft Mouse Model
Source: MDPI journal article supplement (doi:10.3390/cancers16040830), 2024-02-19
Supplement: s1 [file s1]

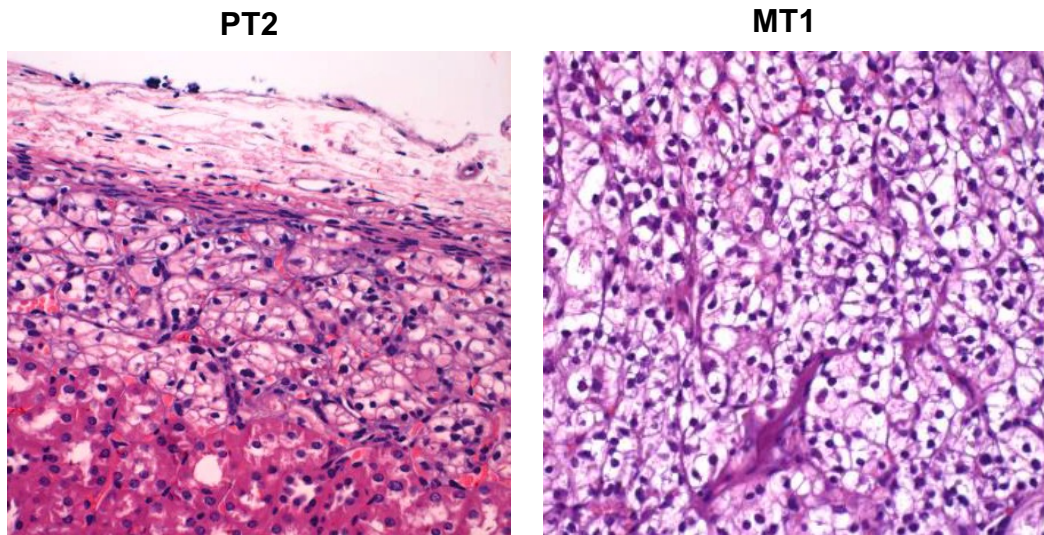

**Figure S7.** H&E-stained sections of subcapsular patient-derived ccRCC tumors in NOD-SCID mice, at 6 weeks post-inoculation. Left, PT2; Right, MT1. Both tumors display the clear cytoplasm characteristic of ccRCC. 40X magnification.
