# Supplementary material for: Knockdown of Antisense Noncoding Mitochondrial RNA Reduces Tumorigenicity of Patient-Derived Clear Cell Renal Carcinoma Cells in an Orthotopic Xenograft Mouse Model
Source: MDPI journal article supplement (doi:10.3390/cancers16040830), 2024-02-19
Supplement: s1 [file s1]

**a**

|         | Cyc B1     | $\beta$ -actin | Cyc1/ $\beta$ -act | CycB1/ $\beta$ -act normalized to NT |
|---------|------------|----------------|--------------------|--------------------------------------|
| NT1     | 8,523,610  | 3,685,284      | 2.312877379        | 1                                    |
| ASO-C 1 | 9,789,075  | 3,596,284      | 2.721997206        | 1.176887815                          |
| 1537-1  | 2,578,154  | 3,883,698      | 0.663839979        | 0.287019098                          |
| NT2     | 11,019,660 | 4,184,527      | 2.633430254        | 1                                    |
| ASO-C 2 | 10,608,347 | 4,320,820      | 2.455169852        | 0.932308668                          |
| 1537-2  | 3,514,397  | 4,354,820      | 0.807013149        | 0.30644941                           |
| NT3     | 10,458,933 | 4,546,062      | 2.3006578          | 1                                    |
| ASO-C 3 | 9,054,518  | 4,709,477      | 1.92261646         | 0.835681195                          |
| 1537-3  | 2,347,912  | 3,866,941      | 0.607175543        | 0.263913887                          |

**b**

|         | Cyc D1     | $\beta$ -actin | CycD1/ $\beta$ -act | CycD1/ $\beta$ -act normalized to NT |
|---------|------------|----------------|---------------------|--------------------------------------|
| NT1     | 10,260,167 | 3,685,284      | 2.78409127          | 1                                    |
| ASO-C 1 | 10,319,418 | 3,596,284      | 2.86946693          | 1.03066554                           |
| 1537-1  | 4,492,276  | 3,883,698      | 1.15670065          | 0.415467935                          |
| NT2     | 7,574,175  | 4,184,527      | 1.81004329          | 1                                    |
| ASO-C 2 | 7,978,054  | 4,320,820      | 1.84642128          | 1.020097859                          |
| 1537-2  | 3,923,134  | 4,354,820      | 0.90087168          | 0.497707256                          |
| NT3     | 10,109,116 | 4,546,062      | 2.22370834          | 1                                    |
| ASO-C 3 | 9,336,288  | 4,709,477      | 1.98244688          | 0.891504899                          |
| 1537-3  | 4,238,225  | 3,866,941      | 1.09601491          | 0.492877097                          |

**c**

|         | N-cadh     | $\beta$ -actin | N-cadh/ $\beta$ act | N-cadh/ $\beta$ -act normalized to NT |
|---------|------------|----------------|---------------------|---------------------------------------|
| NT1     | 12,810,468 | 3,685,284      | 3.476114188         | 1                                     |
| ASO-C 1 | 7,617,276  | 3,596,284      | 2.118096346         | 0.609328759                           |
| 1537-1  | 214,435    | 3,883,698      | 0.055214128         | 0.015883865                           |
| NT2     | 11,556,468 | 4,184,527      | 2.761714287         | 1                                     |
| ASO-C 2 | 12,008,761 | 4,320,820      | 2.779278239         | 1.006359801                           |
| 1537-2  | 2,848,326  | 4,354,820      | 0.654062854         | 0.236832194                           |
| NT3     | 9,483,397  | 4,546,062      | 2.086068558         | 1                                     |
| ASO-C 3 | 11,113,933 | 4,709,477      | 2.359908117         | 1.131270642                           |
| 1537-3  | 2,674,912  | 3,866,941      | 0.691738509         | 0.331599125                           |

**Figure S5. Densitometry readings and plotted values of Western blots of Fig. 3b. (a) Cyclin B1, (b) Cyclin D1, (c) N-cadherin.** Readings were obtained using ImageJ and values were normalized to non-treated samples (NT).
