# Supplementary material for: Knockdown of Antisense Noncoding Mitochondrial RNA Reduces Tumorigenicity of Patient-Derived Clear Cell Renal Carcinoma Cells in an Orthotopic Xenograft Mouse Model
Source: MDPI journal article supplement (doi:10.3390/cancers16040830), 2024-02-19
Supplement: s1 [file s1]

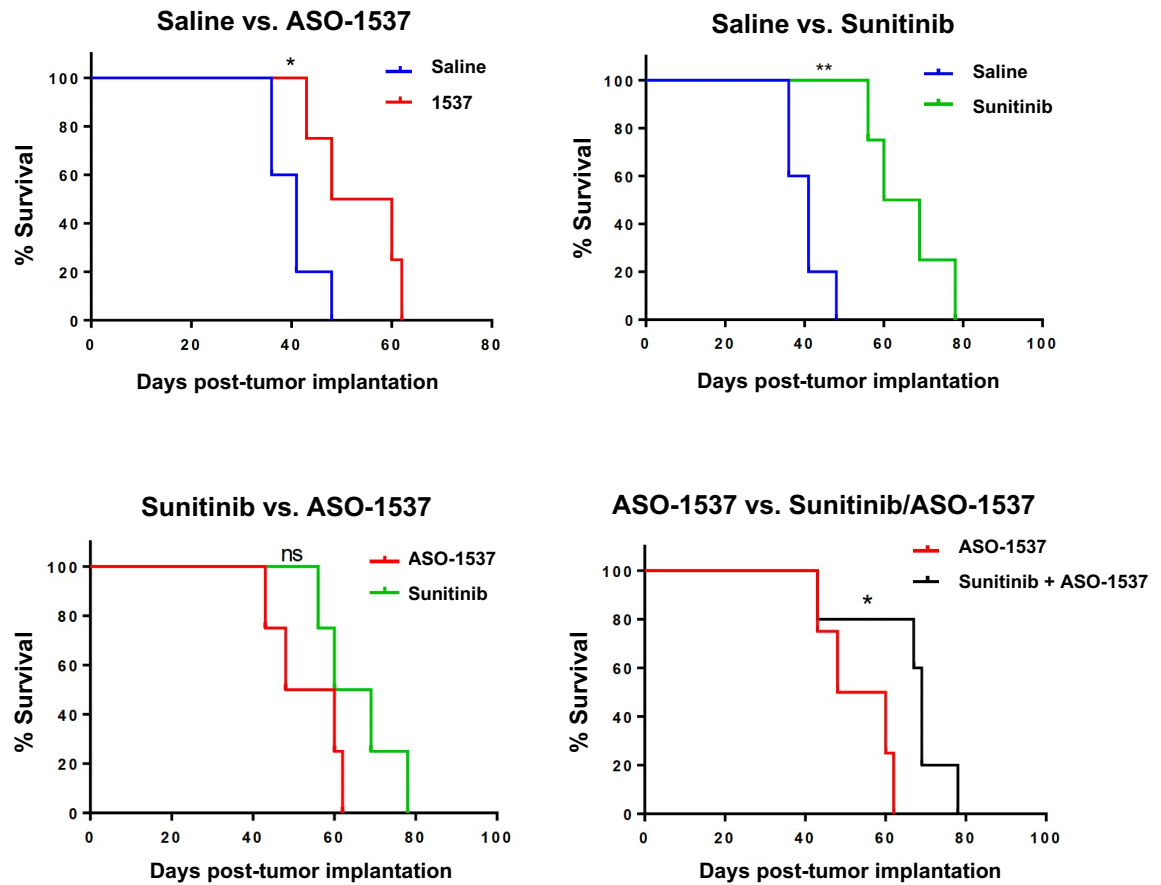

**Figure S8. Survival curves of NOD/SCID mice implanted subcutaneously with MT1 tumor fragments.** For better clarity, data is separated to compare 2 conditions in each graph. Kaplan-Meier plots; \* $p < 0.5$ ; \*\* $p < 0.1$ ; ns, non-significant.
