# Supplementary material for: Knockdown of Antisense Noncoding Mitochondrial RNA Reduces Tumorigenicity of Patient-Derived Clear Cell Renal Carcinoma Cells in an Orthotopic Xenograft Mouse Model
Source: MDPI journal article supplement (doi:10.3390/cancers16040830), 2024-02-19
Supplement: s1 [file s1]

**a**

|         | Survivin  | $\beta$ -actin | Surv/ $\beta$ -act | Surv/ $\beta$ -act normalized to NT |
|---------|-----------|----------------|--------------------|-------------------------------------|
| NT1     | 5,285,134 | 3,685,284      | 1.43411851         | 1                                   |
| ASO-C 1 | 6,463,719 | 3,596,284      | 1.797332747        | 1.253266542                         |
| 1537-1  | 50,364    | 3,883,698      | 0.012968053        | 0.009042525                         |
| NT2     | 6,072,548 | 4,184,527      | 1.451191019        | 1                                   |
| ASO-C 2 | 6,074,891 | 4,320,820      | 1.405957897        | 0.968830346                         |
| 1537-2  | 0         | 4,354,820      | 0                  | 0                                   |
| NT3     | 5,552,719 | 4,546,062      | 1.221434947        | 1                                   |
| ASO-C 3 | 5,539,376 | 4,709,477      | 1.17621893         | 0.962981232                         |
| 1537-3  | 6,121     | 3,866,941      | 0.001582905        | 0.001295939                         |

**b**

|         | Uncleaved PARP1 | Cleaved PARP1 | % Cleaved PARP1/Total PARP1 |
|---------|-----------------|---------------|-----------------------------|
| NT1     | 11,732,907      | 57,192        | 0.485084985                 |
| ASO-C 1 | 14,606,522      | 603,477       | 3.967633397                 |
| 1537-1  | 7,643,510       | 10,192,551    | 57.14575096                 |
| NT1     | 15,429,978      | 61,192        | 0.395012126                 |
| ASO-C 2 | 17,183,593      | 113,607       | 0.656794163                 |
| 1537-2  | 5,346,560       | 2,240,125     | 29.52705958                 |
| NT1     | 14,749,865      | 20,950        | 0.141833744                 |
| ASO-C 3 | 13,515,401      | 150,607       | 1.102055553                 |
| 1537-3  | 3,535,267       | 3,502,995     | 49.77073886                 |

**Figure S4. Densitometry readings and plotted values of Western blots of Fig. 2d. (a) Survivin, (b) Cleaved and uncleaved PARP1.** Readings were obtained using ImageJ and values were normalized to non-treated samples (NT).
