# Supplementary material for: Knockdown of Antisense Noncoding Mitochondrial RNA Reduces Tumorigenicity of Patient-Derived Clear Cell Renal Carcinoma Cells in an Orthotopic Xenograft Mouse Model
Source: MDPI journal article supplement (doi:10.3390/cancers16040830), 2024-02-19
Supplement: s1 [file s1]

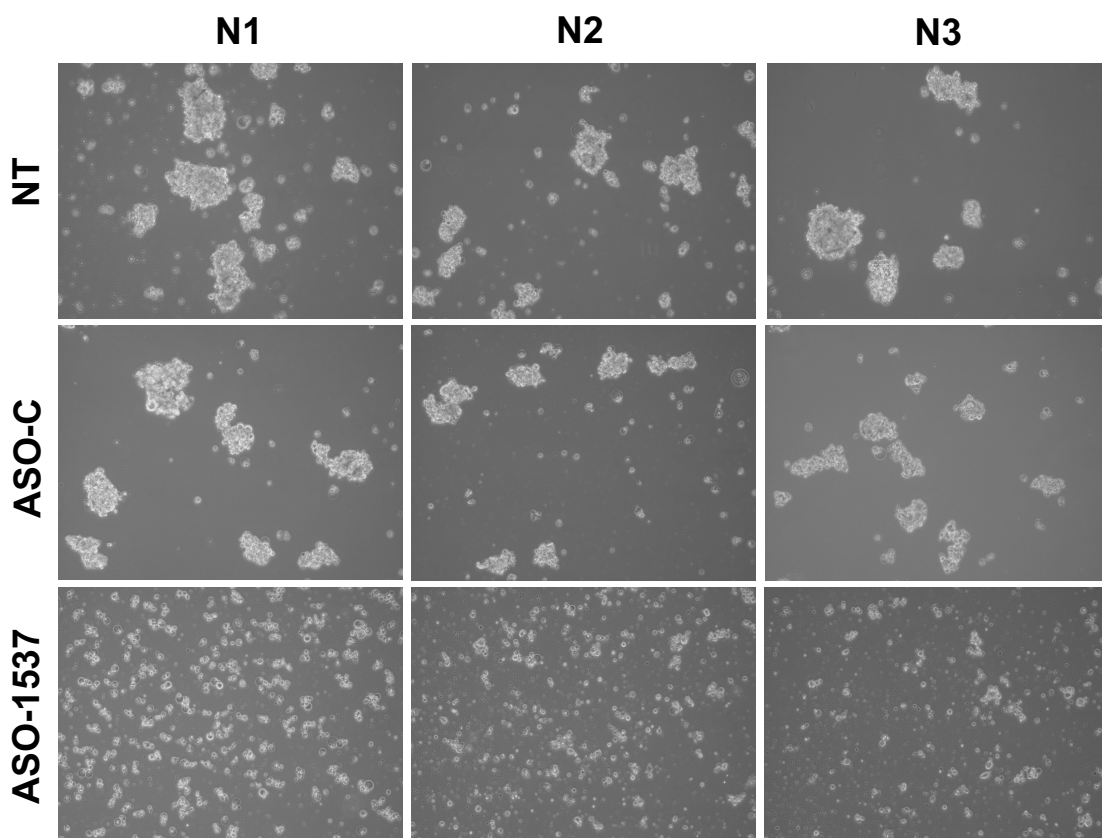

**Figure S6. Spheroid formation of MT1 cells under anchorage-independent conditions.** Representative images from 3 biological replicates (N1, N2, N3). 10X magnification.
