# Supplementary material for: Knockdown of Antisense Noncoding Mitochondrial RNA Reduces Tumorigenicity of Patient-Derived Clear Cell Renal Carcinoma Cells in an Orthotopic Xenograft Mouse Model
Source: MDPI journal article supplement (doi:10.3390/cancers16040830), 2024-02-19
Supplement: s1 [file s1]

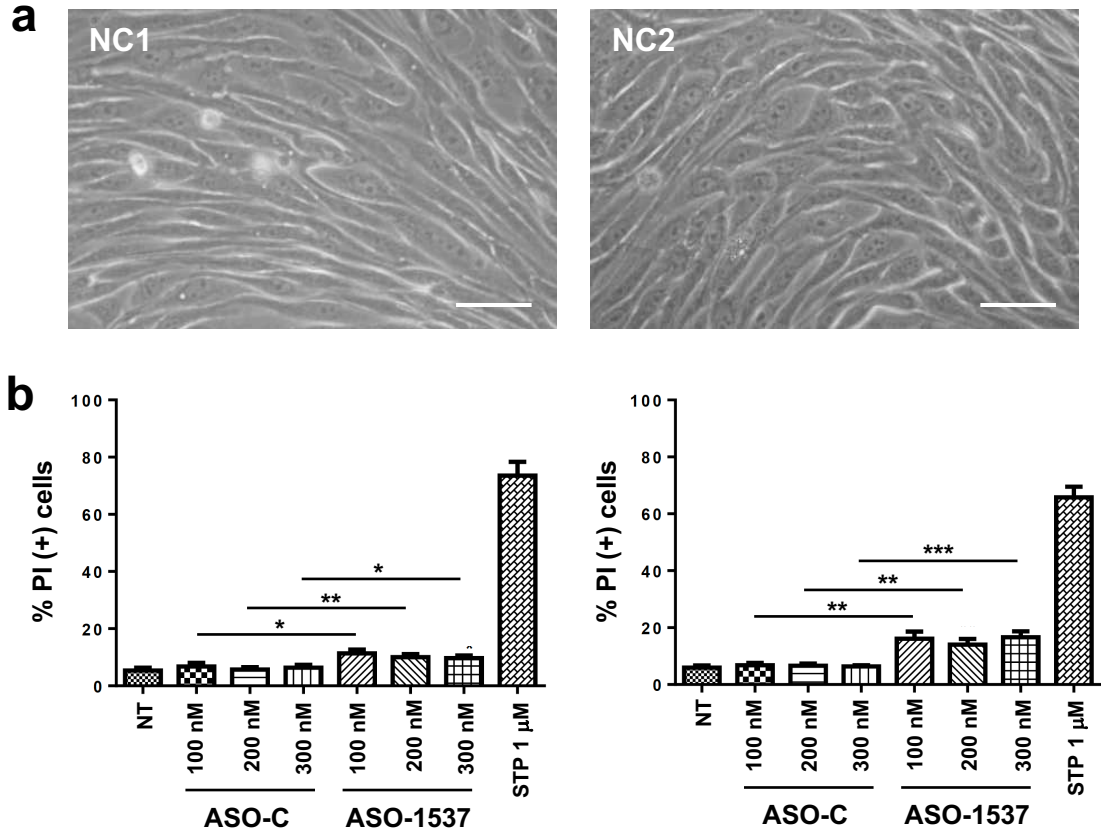

**Figure S1. Normal kidney epithelial cultures are resistant to ASO-1537 treatment.** Two individual cultures, NC1 and NC2, from non-tumor tissue obtained from ccRCC patients (a) were transfected with ASO-C or ASO-1537 at 100, 200 and 300 nM for 48 h, stained with PI and analyzed by flow cytometry. Although slightly higher than ASO-C, ASO-1537 elicited only a modest % of cell death even at the highest concentration. Staurosporin (STP) was used as a positive control for cell death. \* $p < 0.05$ ; \*\* $p < 0.01$ ; \*\*\* $p < 0.001$ . Bars in a = 100  $\mu\text{m}$ .
