# Supplementary material for: Knockdown of Antisense Noncoding Mitochondrial RNA Reduces Tumorigenicity of Patient-Derived Clear Cell Renal Carcinoma Cells in an Orthotopic Xenograft Mouse Model
Source: MDPI journal article supplement (doi:10.3390/cancers16040830), 2024-02-19
Supplement: s1 [file s1]

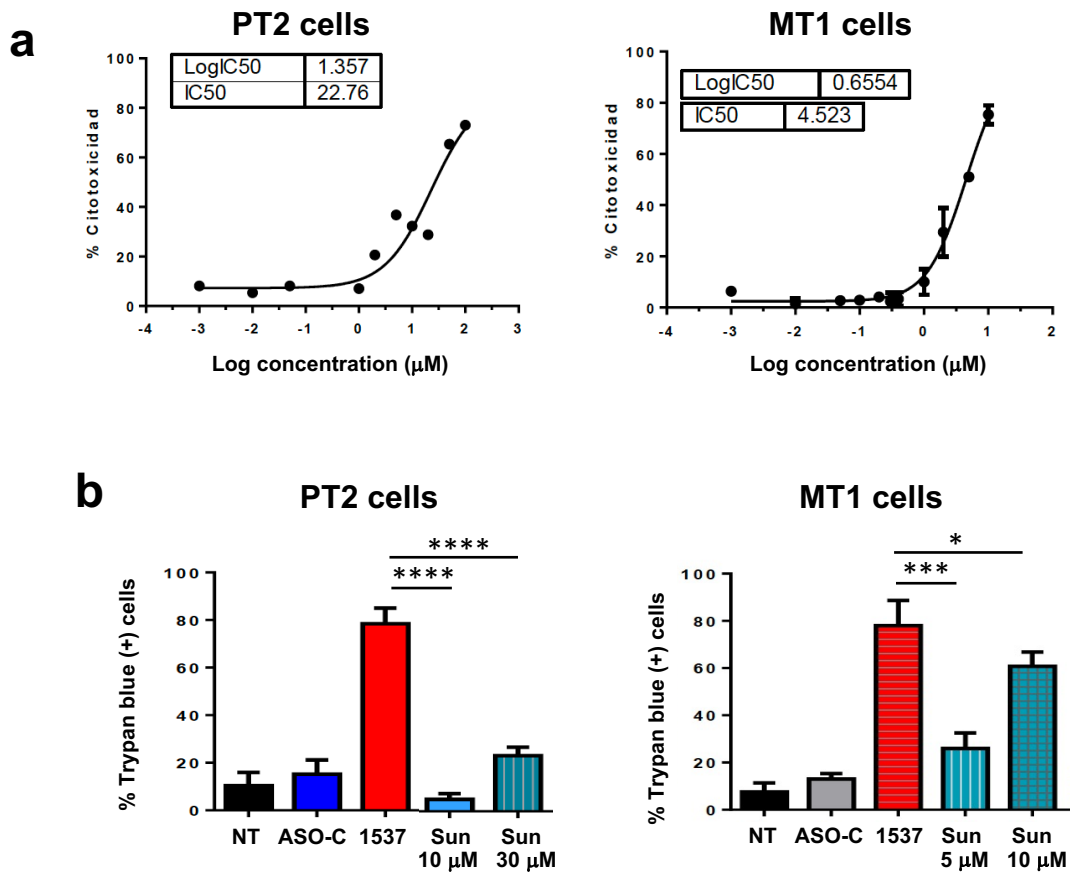

**Figure S2. Comparison of ASO-1537 and Sunitinib on PT2 and MT1 cells.** (a) Sulforhodamine assay for determination of cytotoxicity of Sunitinib on PT2 and MT1 primary ccRCC cultures at 72 h. (b) Trypan blue exclusion assay for cell death of PT2 and MT1 cells comparing NT cells, ASO-C, ASO-1537 and different concentrations of Sunitinib at 48 h. \* $p < 0.05$ ; \*\*\* $p < 0.001$ ; \*\*\*\* $p < 0.0001$ .
